# Supplementary material
Source: ML conference proceedings conference paper supplement (https://proceedings.neurips.cc/paper_files/paper/2023/hash/5b755cf5598a4324d253025e1fbbba52-Abstract.html)
Supplement: Supplementary file 1 [file 5b755cf5598a4324d253025e1fbbba52-Supplemental-Conference.zip]

Archive with 2 entries (2 files):
- supplementary.pdf
- __MACOSX/._supplementary.pdf
